# Supplementary material for: Behavioral and neurogenomic transcriptome changes in wild-derived zebrafish with fluoxetine treatment
Source: PubMed Central journal article supplement (PMC3667115; doi:10.1186/1471-2164-14-348), 2013-05-24

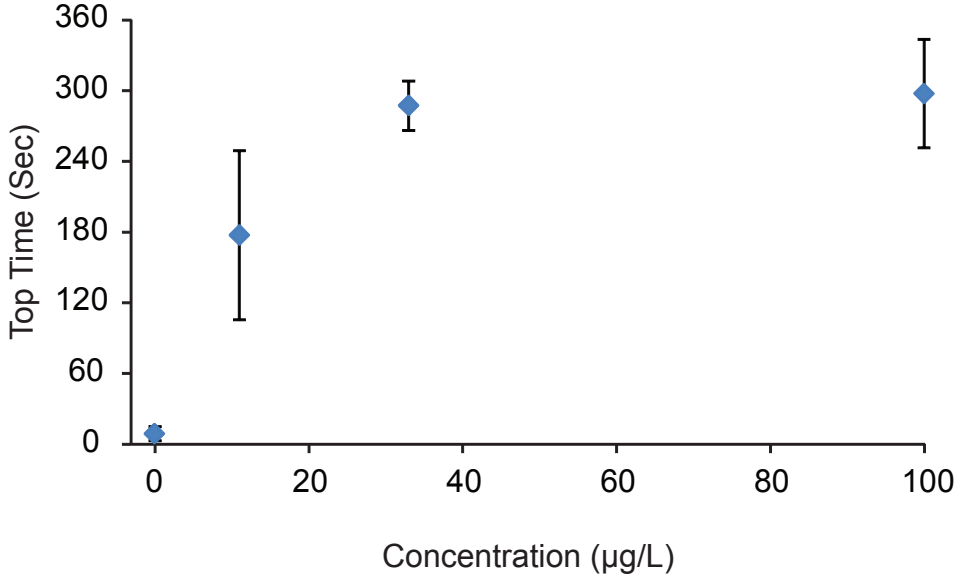

Supplement: 1471-2164-14-348-S1.pdf [file 1471-2164-14-348-S1.pdf]
