# Supplementary material for: Behavioral and neurogenomic transcriptome changes in wild-derived zebrafish with fluoxetine treatment
Source: PubMed Central journal article supplement (PMC3667115; doi:10.1186/1471-2164-14-348), 2013-05-24
Supplement: 1471-2164-14-348-S2.pdf [file 1471-2164-14-348-S2.pdf]

**Supplementary Table 1. qRT-PCR primer characteristics**

| Gene Symbol | Forward Primer                 | Reverse Primer                 | Amplicon Length |
|-------------|--------------------------------|--------------------------------|-----------------|
| SLC6A11     | 5'-ACCCATATTCCACATCACCAG-3'    | 5'-CTATAGCGAGACAAAGGGCG-3'     | 117             |
| SLC6A4B     | 5'-GCCGAGGAGTTTTACACGAGGA-3'   | 5'-ACATATGGCAGGGTGGCAGT-3'     | 188             |
| NRBF2       | 5'-GTGTGGTTGAGTCTGTAGTCG-3'    | 5'-AGCTTTTCTGTGGCAGGAG-3'      | 140             |
| PRL2        | 5'-CTCTCCAATGACCTGCACTC-3'     | 5'-CTCCTCGCGAGCAAGTTTC-3'      | 144             |
| OXTL        | 5'-ATTCGACAGTGTATGCCGTG-3'     | 5'-TCACACGGAGAAGGGAGAAA-3'     | 146             |
| NPY         | 5'-ACTACATCAACCTCATAACAAGGC-3' | 5'-GATGAGATCACCATGCCAAATGAT-3' | 138             |
| EF1A        | 5'-CCTCTTGGTCGCTTTGC-3'        | 5'-GGTGTGATTGAGGGAAATTCA-3'    | 150             |
| UCN3L       | 5'-TGATAGTGACTCGCTTGCCT-3'     | 5'-CATTGTTCTGCCCTGCACTC-3'     | 123             |
| SLC6A4A     | 5'-TAACCACTACAGTTTGGCTTGATG-3' | 5'-AACAGTTAACCGAGCTTGTGAT-3'   | 147             |
| ISG15       | 5'-TCATAACTCGGTGACGATGCAG-3'   | 5'-TGATCCGCTGACCGTTTTTCG-3'    | 170             |

qRT-PCR parameters (all genes): 2 min at 50°C, 2 min at 95°C, followed by 40 cycles at 15 sec 95°C and 1 min 60°C. Primer concentration was 5 pmol for all genes except SLC6A4A (1.5 pmol).
